# Supplementary material for: Selective Expansion of Viral Variants following Experimental Transmission of a Reconstituted Feline Immunodeficiency Virus Quasispecies
Source: PubMed Central journal article supplement (PMC3553009; doi:10.1371/journal.pone.0054871), 2013-01-23
Supplement: pone.0054871.s001.pdf [file pone.0054871.s001.pdf]

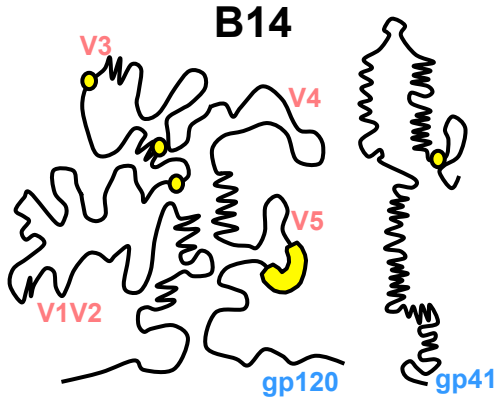

V5 NAb resistant  
 CRD1  
 Anti-CD134 sensitive  
 Soluble CD134 resistant

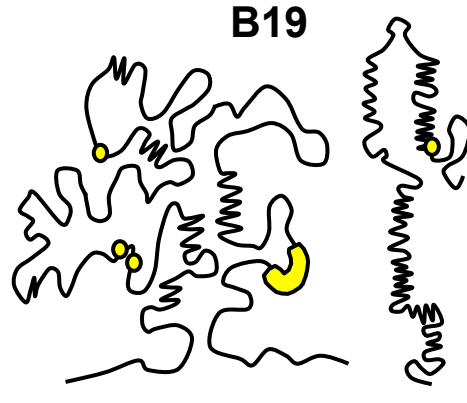

V5 NAb resistant  
 CRD1  
 Anti-CD134 intermediate  
 Soluble CD134 sensitive

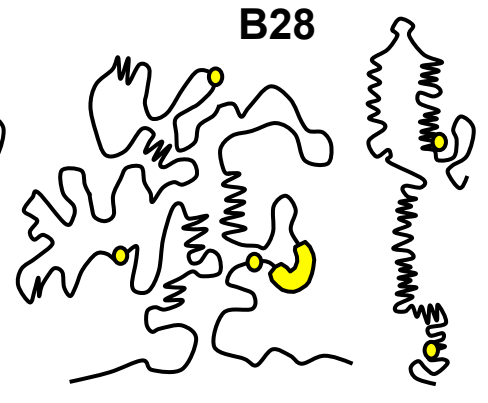

V5 NAb resistant  
 CRD1  
 Anti-CD134 sensitive  
 Soluble CD134 resistant

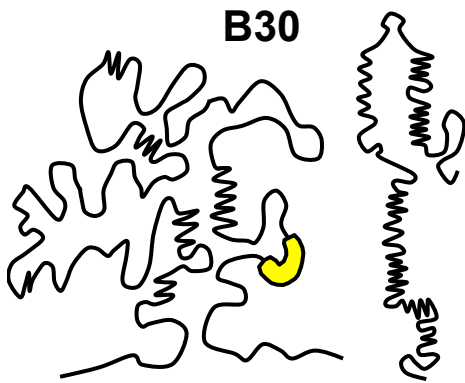

V5 NAb resistant  
 CRD1  
 Anti-CD134 intermediate  
 Soluble CD134 sensitive

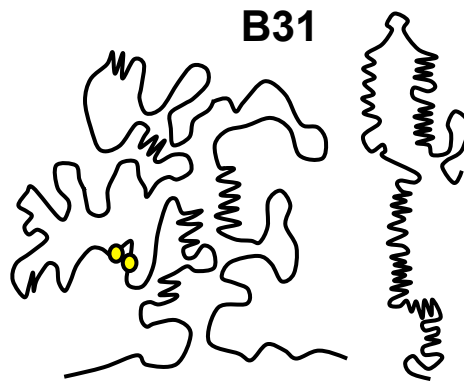

V5 NAb sensitive  
 CRD1+CRD2  
 Anti-CD134 resistant  
 Soluble CD134 sensitive

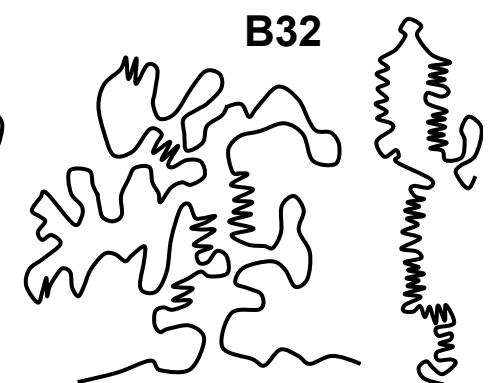

V5 NAb sensitive  
 CRD1+CRD2  
 Anti-CD134 resistant  
 Soluble CD134 sensitive
