# Supplementary material for: Selective Expansion of Viral Variants following Experimental Transmission of a Reconstituted Feline Immunodeficiency Virus Quasispecies
Source: PubMed Central journal article supplement (PMC3553009; doi:10.1371/journal.pone.0054871), 2013-01-23

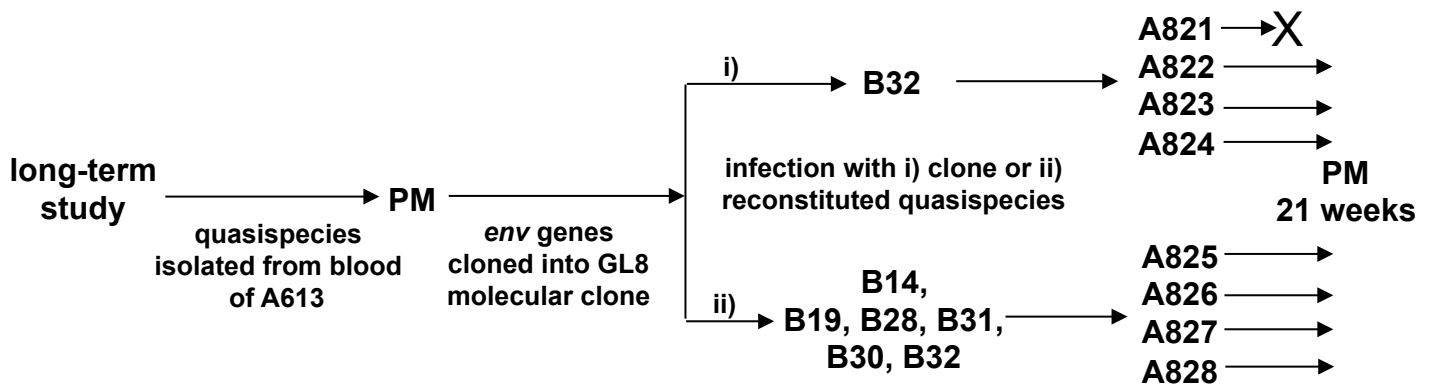

Supplement: pone.0054871.s003.pdf [file pone.0054871.s003.pdf]
